# Supplementary material for: A Novel Phosphorescent Iridium(III) Complex Bearing Formamide for Quantitative Fluorine Anion Detection
Source: MDPI journal article supplement (doi:10.3390/cryst11101190), 2021-09-29
Supplement: s1 [file s1]

Archive with 1 entries (1 files):
- crystals-1381881-supplementary.pdf
